# Supplementary material for: Orally Active Peptide Vector Allows Using Cannabis to Fight Pain While Avoiding Side Effects
Source: PubMed Central journal article supplement (PMC8486167; doi:10.1021/acs.jmedchem.1c00484), 2021-04-23
Supplement: jm1c00484_si_001.pdf [file jm1c00484_si_001.pdf]

# Supporting Information

## An orally active peptide vector allows using cannabis to fight pain while avoiding side effects

Maria Gallo,<sup>†,#</sup> Estefanía Moreno,<sup>‡,#</sup> Sira Defaus,<sup>†</sup> Antonio Ortega-Alvaro,<sup>†</sup> Angel Gonzalez,<sup>§</sup> Patricia Robledo,<sup>^</sup> Marco Cavaco,<sup>||</sup> Vera Neves,<sup>||</sup> Miguel A. R. B. Castanho,<sup>||</sup> Vicent Casadó,<sup>‡</sup> Leonardo Pardo,<sup>§</sup> Rafael Maldonado,<sup>\*,†</sup> David Andreu<sup>\*,†</sup>

<sup>†</sup>Department of Experimental and Health Sciences, Universitat Pompeu Fabra, Barcelona Biomedical Research Park, 08003 Barcelona, Spain.

<sup>‡</sup>Department of Biochemistry and Molecular Biomedicine, Institute of Biomedicine, University of Barcelona, 08028 Barcelona, Spain.

<sup>§</sup>Laboratori de Medicina Computacional, Unitat de Bioestadística, Facultat de Medicina, Universitat Autònoma de Barcelona, 08193 Bellaterra, Spain.

<sup>^</sup>Integrative Pharmacology and Systems Neuroscience, IMIM-Hospital del Mar Research Institute, 08003 Barcelona, Spain.

<sup>||</sup>Instituto de Medicina Molecular, Faculdade de Medicina, Universidade de Lisboa, 1649-028 Lisboa, Portugal.

\* Rafael Maldonado, Phone: (+34) 933160824, [rafael.maldonado@upf.edu](mailto:rafael.maldonado@upf.edu)

\* David Andreu, Phone: (+34) 933160868, [david.andreu@upf.edu](mailto:david.andreu@upf.edu)

## Contents

|                                          | Pages   |
|------------------------------------------|---------|
| <b>1. Supporting Information Tables</b>  |         |
| Table S1                                 | S4      |
| Table S2                                 | S5      |
| Table S3                                 | S6      |
| Table S4                                 | S7      |
| Table S5                                 | S8      |
| <b>2. Supporting Information Figures</b> |         |
| Figure S1                                | S10     |
| Figure S2                                | S11     |
| Figure S3                                | S12     |
| <b>3. Analytical data</b>                |         |
| HPLC-MS analyses                         | S14-S19 |
| <b>4. Molecular Formula Strings</b>      |         |
| SMILES notations                         | S21-S25 |

## **1. Supporting Information Tables**

**Table S1.** Design and synthesis of TMs 5 and 6 short analogs

| Peptide        | Sequence <sup>a,b</sup>                | Theoretical mass (Da) | Experimental mass (Da) | HPLC gradient <sup>c</sup> (% ACN) | HPLC retention time (min) |
|----------------|----------------------------------------|-----------------------|------------------------|------------------------------------|---------------------------|
| <b>TM5-Tat</b> | ETYLMFWIGVTSVLLLLFIVYAYMYILWGRKKRRQRRR | 4726.8                | 4725.8                 | 40-90 %                            | 6.86                      |
| <b>1</b>       | VYAYMYILWGRKKRRQRRR                    | 2599.2                | 2598.7                 | 10-50 %                            | 5.99                      |
| <b>2</b>       | VYAYMYILW                              | 1220.5                | 1219.4                 | 25-60%                             | 7.75                      |
| <b>Tat-TM6</b> | GRKKRRQRRRKTLVLILVVLIIICWGPELLAIMVYDVF | 4322.5                | 4322.6                 | 0-95 %                             | 10.75                     |
| <b>3</b>       | GRKKRRQRRRKTLVLILVV                    | 2375.0                | 2375.1                 | 10-60 %                            | 5.81                      |
| <b>4</b>       | KTLVLILVV                              | 996.3                 | 995.7                  | 20-60%                             | 9.50                      |
| <b>TM7-Tat</b> | LIKTVFAFCSMLCLLNSTVNP IIYALRGRKKRRQRRR | 4420.4                | 4421.4                 | 30-60 %                            | 5.87                      |

<sup>a</sup> All peptides are C-terminal carboxamides; <sup>b</sup> Tat(48-57) sequence GRKKRRQRRR; <sup>c</sup> linear gradient over 15 min, initial and final ACN concentrations noted.

**Table S2.** HIV-Tat replacement by shorter CPPs

| Peptide   | Sequence <sup>a,b,c</sup> | Theoretical mass (Da) | Experimental mass (Da) | HPLC gradient <sup>d</sup> (% ACN) | HPLC retention time (min) |
|-----------|---------------------------|-----------------------|------------------------|------------------------------------|---------------------------|
| <b>1</b>  | VYAYMYILWGRKKRRQRRR       | 2599.2                | 2598.7                 | 10-50                              | 5.99                      |
| <b>5</b>  | VYAYMYILWAGILKRW          | 2045.5                | 2045.4                 | 25-50                              | 8.83                      |
| <b>6</b>  | VYAYMYILWSKSKSK           | 1866.3                | 1866.1                 | 15-50                              | 8.19                      |
| <b>7</b>  | VYAYMYILWRLRWR            | 1988.4                | 1988.1                 | 25-55                              | 6.57                      |
| <b>8</b>  | VYAYMYILWRKR              | 1661.0                | 1661.5                 | 20-45                              | 6.09                      |
| <b>3</b>  | GRKKRRQRRRKTLVLILVV       | 2375.0                | 2375.1                 | 10-60                              | 5.81                      |
| <b>9</b>  | AGILKRWKTLVLILVV          | 1821.4                | 1820.9                 | 25-55                              | 7.10                      |
| <b>10</b> | SKSKSKKTLVLILVV           | 1642.1                | 1642.7                 | 15-60                              | 7.43                      |
| <b>11</b> | RLRWRKTLVLILVV            | 1764.3                | 1764.2                 | 15-70                              | 8.25                      |
| <b>12</b> | RKRKTLVLILVV              | 1436.9                | 1436.6                 | 20-45                              | 6.01                      |

<sup>a</sup> All peptides are C-terminal carboxamides; <sup>b</sup> residues in red correspond to Tat(48-57); <sup>c</sup> residues in blue correspond to various shorter CPPs (see main text); <sup>d</sup> linear gradient over 15 min, initial and final ACN concentrations noted.

**Table S3.** Applying CPP stereochemistry change

| Peptide | Sequence <sup>a,b</sup> | Theoretical mass (Da) | Experimental mass (Da) | HPLC gradient <sup>c</sup> (% ACN) | HPLC retention time (min) |
|---------|-------------------------|-----------------------|------------------------|------------------------------------|---------------------------|
| 5       | VYAYMYILWAGILKRW        | 2045.5                | 2045.4                 | 25-50                              | 8.83                      |
| 6       | VYAYMYILWSKSKSK         | 1866.3                | 1866.1                 | 15-50                              | 8.19                      |
| 13      | VYAYMYILWAGilkrw        | 2045.5                | 2045.3                 | 30-60                              | 4.89                      |
| 14      | VYAYMYILWsksksk         | 1866.3                | 1867.5                 | 15-50                              | 8.01                      |
| 9       | AGILKRWKTLVLILVV        | 1821.4                | 1820.9                 | 25-55                              | 7.10                      |
| 10      | SKSKSKKTLVLILVV         | 1642.1                | 1642.1                 | 15-60                              | 7.43                      |
| 15      | AGilkrwKTLVLILVV        | 1821.4                | 1821.2                 | 25-50                              | 5.90                      |
| 16      | skskskKTLVLILVV         | 1642.1                | 1642.8                 | 15-60                              | 7.17                      |

<sup>a</sup> All peptides are C-terminal carboxamides; <sup>b</sup> residues in blue correspond to the *in vitro* optimally performing L- amino acid CPPs (see Figure S2); in magenta to the D-CPP counterparts; <sup>c</sup> linear gradient over 15 min, initial and final ACN concentrations noted.

**Table S4.** Applying configurational switch and sequence reversal for last-stage lead optimization

| Peptide | Sequence <sup>a,b,c</sup>              | Theoretical mass (Da) | Experimental mass (Da) | HPLC gradient <sup>d</sup> (% ACN) | HPLC retention time (min) |
|---------|----------------------------------------|-----------------------|------------------------|------------------------------------|---------------------------|
| 13      | VYAYMYILW <b>aGilkrw</b>               | 2045.5                | 2045.3                 | 30-60                              | 4.89                      |
| 17      | wliy <sup>y</sup> myayv <b>aGilkrw</b> | 2045.5                | 2045.3                 | 30-55                              | 6.93                      |
| 15      | <b>aGilkrw</b> KTLVLILVV               | 1821.4                | 1821.2                 | 25-50                              | 5.90                      |
| 18      | <b>aGilkrw</b> vvlilvltk               | 1821.4                | 1821.2                 | 30-60                              | 6.14                      |

<sup>a</sup> All peptides are C-terminal carboxamides; <sup>b</sup> residues in magenta correspond to the *in vitro* optimally performing CPP/BBB shuttle (see Figure S2-S3); <sup>c</sup> upper and lowercase denote L- and D-residues, respectively; <sup>d</sup> linear gradient over 15 min, initial and final ACN concentrations noted.

**Table S5.** Statistical analyses used in signaling experiments

|  | Factor                           | p-value                     | Conclusions                                                                                                                                                                                                                                                                                                                                                                                                                                                                                                                                                                                                                                                                                                                                                                                                                                                                                                                                                                                                                                                 |
|--|----------------------------------|-----------------------------|-------------------------------------------------------------------------------------------------------------------------------------------------------------------------------------------------------------------------------------------------------------------------------------------------------------------------------------------------------------------------------------------------------------------------------------------------------------------------------------------------------------------------------------------------------------------------------------------------------------------------------------------------------------------------------------------------------------------------------------------------------------------------------------------------------------------------------------------------------------------------------------------------------------------------------------------------------------------------------------------------------------------------------------------------------------|
|  | ligand<br>peptide<br>interaction | <0.0001<br>0.049<br>0.218   | 5HT <sub>2A</sub> Rago < FK (p<0.0001)<br>CB <sub>1</sub> Rago < FK (p<0.0001)<br>5HT <sub>2A</sub> Rago+CB <sub>1</sub> Rago < 5HT <sub>2A</sub> Rago (p=0.981)<br>5HT <sub>2A</sub> Rago+CB <sub>1</sub> Rago < CB <sub>1</sub> Rago (p>0.999)<br>5HT <sub>2A</sub> Rago+CB <sub>1</sub> Ranta vs. 5HT <sub>2A</sub> Rago (p<0.0001)<br>CB <sub>1</sub> Rago+5HT <sub>2A</sub> Ranta vs. CB <sub>1</sub> Rago (p<0.0001)                                                                                                                                                                                                                                                                                                                                                                                                                                                                                                                                                                                                                                  |
|  | ligand<br>peptide<br>interaction | <0.0001<br>0.004<br>0.297   | 5HT <sub>2A</sub> Rago < FK (p<0.0001)<br>CB <sub>1</sub> Rago < FK (p<0.0001)<br>5HT <sub>2A</sub> Rago+CB <sub>1</sub> Rago < 5HT <sub>2A</sub> Rago (p<0.0001)<br>5HT <sub>2A</sub> Rago+CB <sub>1</sub> Rago < CB <sub>1</sub> Rago (p<0.0001)<br>5HT <sub>2A</sub> Rago+CB <sub>1</sub> Ranta vs. 5HT <sub>2A</sub> Rago (p=0.99)<br>CB <sub>1</sub> Rago+5HT <sub>2A</sub> Ranta vs. CB <sub>1</sub> Rago (p=0.49)<br>TM5-Tat vs. 1 (p=0.200)<br>Tat-TM6 vs. 3 (p>0.999)                                                                                                                                                                                                                                                                                                                                                                                                                                                                                                                                                                              |
|  | ligand<br>peptide<br>interaction | <0.0001<br>0.018<br>0.605   | 5HT <sub>2A</sub> Rago > basal (p=0.007)<br>CB <sub>1</sub> Rago > basal (p=0.001)<br>5HT <sub>2A</sub> Rago+CB <sub>1</sub> Rago > 5HT <sub>2A</sub> Rago (p<0.0001)<br>5HT <sub>2A</sub> Rago+CB <sub>1</sub> Rago > CB <sub>1</sub> Rago (p<0.0001)<br>5HT <sub>2A</sub> Rago+CB <sub>1</sub> Ranta vs. 5HT <sub>2A</sub> Rago (p=0.999)<br>CB <sub>1</sub> Rago+5HT <sub>2A</sub> Ranta vs. CB <sub>1</sub> Rago (p=0.922)<br>TM5-Tat vs. 1 (p=0.661)<br>Tat-TM6 vs. 3 (p=0.02)                                                                                                                                                                                                                                                                                                                                                                                                                                                                                                                                                                         |
|  | ligand<br>peptide<br>interaction | <0.0001<br>0.04<br>0.412    | 5HT <sub>2A</sub> Rago < FK (p<0.0001)<br>CB <sub>1</sub> Rago < FK (p<0.0001)<br>5HT <sub>2A</sub> Rago+CB <sub>1</sub> Rago < 5HT <sub>2A</sub> Rago (p<0.0001)<br>5HT <sub>2A</sub> Rago+CB <sub>1</sub> Rago < CB <sub>1</sub> Rago (p<0.0001)<br>5HT <sub>2A</sub> Rago+CB <sub>1</sub> Ranta vs. 5HT <sub>2A</sub> Rago (p=0.975)<br>CB <sub>1</sub> Rago+5HT <sub>2A</sub> Ranta vs. CB <sub>1</sub> Rago (p=0.821)<br>1 vs. 5 (p=0.999)<br>1 vs. 6 (p=0.141)<br>3 vs. 9 (p=0.958)<br>3 vs. 10 (p=0.981)                                                                                                                                                                                                                                                                                                                                                                                                                                                                                                                                             |
|  | ligand<br>peptide<br>interaction | <0.0001<br><0.0001<br>0.061 | 5HT <sub>2A</sub> Rago > basal (p<0.0001)<br>CB <sub>1</sub> Rago > basal (p<0.0001)<br>5HT <sub>2A</sub> Rago+CB <sub>1</sub> Rago > 5HT <sub>2A</sub> Rago (p<0.0001)<br>5HT <sub>2A</sub> Rago+CB <sub>1</sub> Rago > CB <sub>1</sub> Rago (p<0.0001)<br>5HT <sub>2A</sub> Rago+CB <sub>1</sub> Ranta vs. 5HT <sub>2A</sub> Rago (p=0.658)<br>CB <sub>1</sub> Rago+5HT <sub>2A</sub> Ranta vs. CB <sub>1</sub> Rago (p>0.999)<br>1 vs. 6 (p=0.999)<br>3 vs. 10 (p=0.192)                                                                                                                                                                                                                                                                                                                                                                                                                                                                                                                                                                                 |
|  | ligand<br>peptide<br>interaction | <0.0001<br><0.0001<br>0.095 | 5HT <sub>2A</sub> Rago < FK (p<0.0001)<br>CB <sub>1</sub> Rago < FK (p<0.0001)<br>5HT <sub>2A</sub> Rago+CB <sub>1</sub> Rago < 5HT <sub>2A</sub> Rago (p<0.0001)<br>5HT <sub>2A</sub> Rago+CB <sub>1</sub> Rago < CB <sub>1</sub> Rago (p<0.0001)<br>5HT <sub>2A</sub> Rago+CB <sub>1</sub> Ranta vs. 5HT <sub>2A</sub> Rago (p=0.999)<br>CB <sub>1</sub> Rago+5HT <sub>2A</sub> Ranta vs. CB <sub>1</sub> Rago (p=0.999)<br>5 vs. 13 (p=0.497)<br>6 vs. 14 (p>0.999)<br>9 vs. 15 (p=0.131)<br>10 vs. 16 (p>0.999)                                                                                                                                                                                                                                                                                                                                                                                                                                                                                                                                         |
|  | ligand<br>peptide<br>interaction | <0.0001<br>0.002<br>0.007   | 5HT <sub>2A</sub> Rago > basal (6:p=0.19;14:p=0.37;10:p=0.0001;16:p=0.002)<br>CB <sub>1</sub> Rago > basal (6:p=0.18;14:p=0.02;10:p<0.0001;16:p=0.01)<br>5HT <sub>2A</sub> Rago+CB <sub>1</sub> Rago > 5HT <sub>2A</sub> Rago (6,14,10:p<0.001;16:p=0.01)<br>5HT <sub>2A</sub> Rago+CB <sub>1</sub> Rago > CB <sub>1</sub> Rago (6,14,10:p<0.001;16:p=0.002)<br>5HT <sub>2A</sub> Rago+CB <sub>1</sub> Ranta vs. 5HT <sub>2A</sub> Rago (6,10,16:p>0.8;14:p=0.053)<br>CB <sub>1</sub> Rago+5HT <sub>2A</sub> Ranta vs. CB <sub>1</sub> Rago (6,14,16,10:p>0.58)<br>6 vs. 14 (5HT <sub>2A</sub> Rago:p=0.94; CB <sub>1</sub> Rago:p=0.67;<br>5HT <sub>2A</sub> Rago+CB <sub>1</sub> Rago:p=0.12; 5HT <sub>2A</sub> Rago+CB <sub>1</sub> Ranta:p=0.01;<br>CB <sub>1</sub> Rago+5HT <sub>2A</sub> Ranta:p=0.08)<br>10 vs. 16 (5HT <sub>2A</sub> Rago:p=0.85; CB <sub>1</sub> Rago:p=0.15;<br>5HT <sub>2A</sub> Rago+CB <sub>1</sub> Rago:p=0.11; 5HT <sub>2A</sub> Rago+CB <sub>1</sub> Ranta:p>0.999;<br>CB <sub>1</sub> Rago+5HT <sub>2A</sub> Ranta:p=0.47) |
|  | ligand<br>peptide<br>interaction | <0.0001<br><0.0001<br>0.057 | 5HT <sub>2A</sub> Rago < FK (p<0.0001)<br>CB <sub>1</sub> Rago < FK (p<0.0001)<br>5HT <sub>2A</sub> Rago+CB <sub>1</sub> Rago < 5HT <sub>2A</sub> Rago (p<0.0001)<br>5HT <sub>2A</sub> Rago+CB <sub>1</sub> Rago < CB <sub>1</sub> Rago (p<0.0001)<br>5HT <sub>2A</sub> Rago+CB <sub>1</sub> Ranta vs. 5HT <sub>2A</sub> Rago (p=0.828)<br>CB <sub>1</sub> Rago+5HT <sub>2A</sub> Ranta vs. CB <sub>1</sub> Rago (p=0.594)<br>TM5-Tat vs. 17 (p<0.0001)<br>Tat-TM6 vs. 18 (p=0.432)                                                                                                                                                                                                                                                                                                                                                                                                                                                                                                                                                                         |

Two-way ANOVA followed by Tukey's multiple comparison tests was used to analyze the data depicted in the left column.



## **2. Supporting Information Figures**

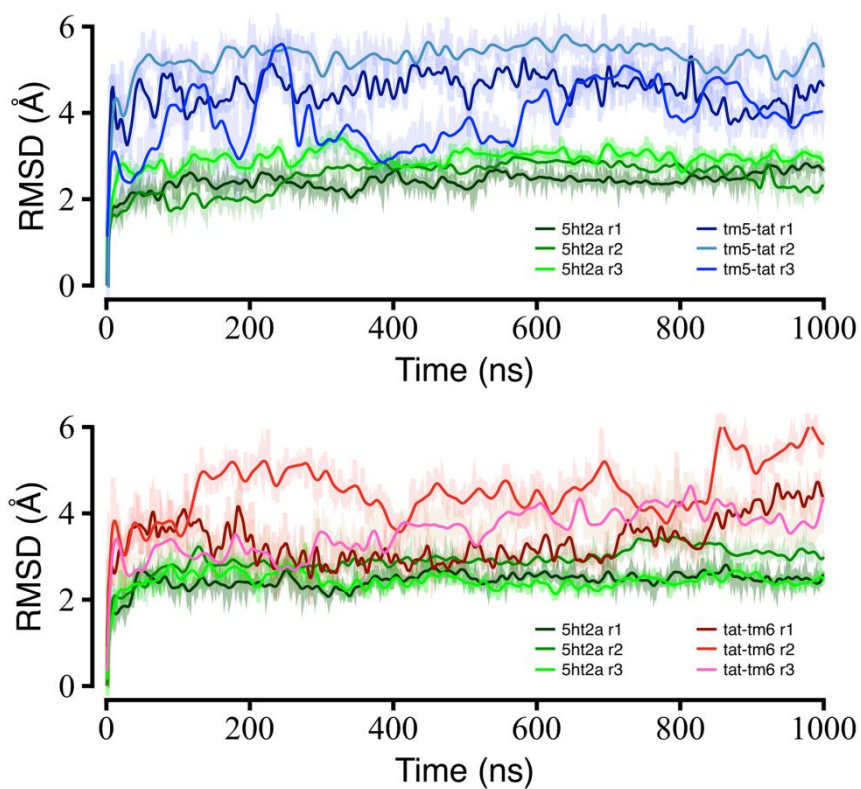

**Figure S1.** The stabilities of the peptide-receptor complexes, during the three replicas (r1, r2, r3) of unbiased MD simulations, are analyzed via root mean-square deviations (RMSD) of the 5HT<sub>2A</sub>R backbone atoms (in green), **TM5-Tat** (in blue) and **Tat-TM6** (in red) peptides, derived from CB<sub>1</sub>R. As expected, rmsd values of the peptides are larger than those of the 5HT<sub>2A</sub>R backbone atoms, largely due to the flexibility of the Tat sequence in the water environment.

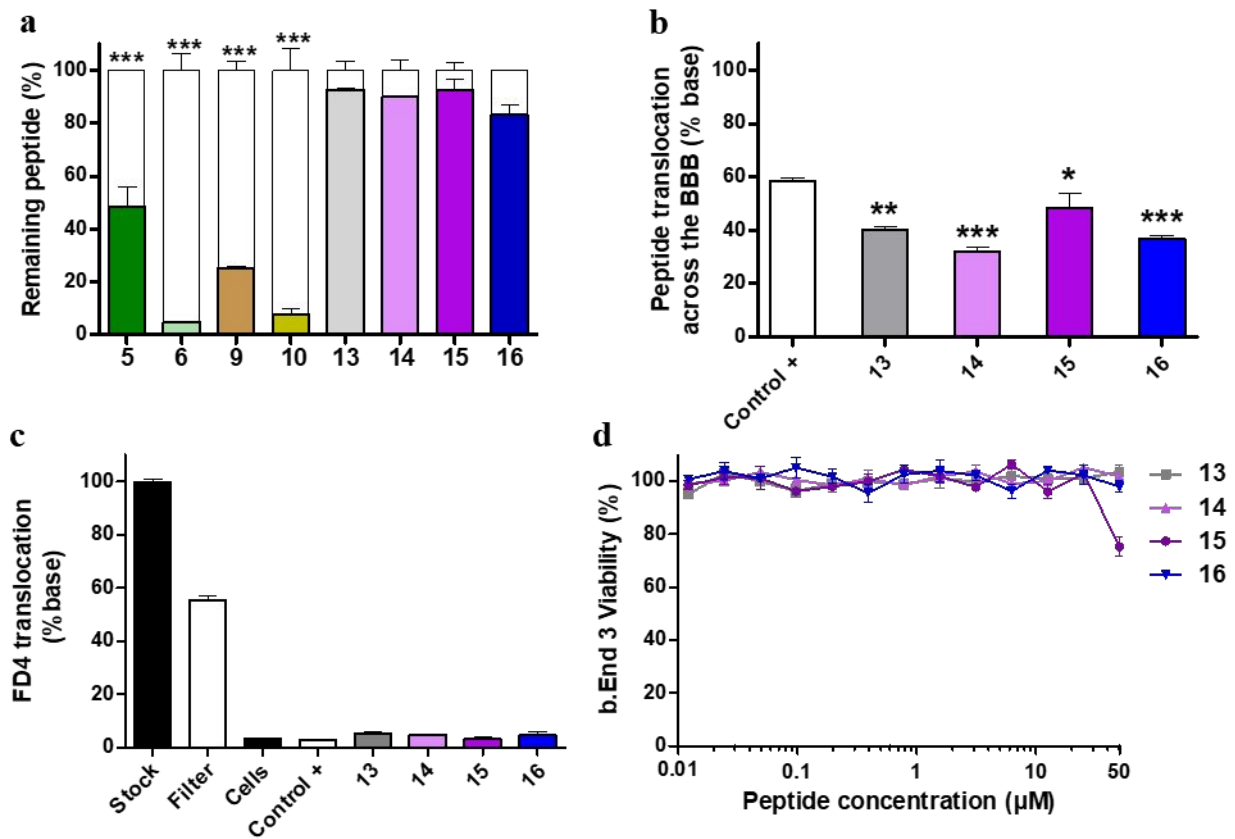

**Figure S2. a, Effect of CPP stereochemistry on trypsin digestion.** Unaltered peptide (color-filled bar) remaining after 24 h trypsin incubation. Main peak integrated areas at 0 h denote 100% undigested peptide (empty bars). The data are presented as mean  $\pm$  SEM of  $n=2$ . One-way ANOVA followed by a Dunnett post hoc test showed a significant poor survival for **5, 6, 9, 10** after 24 h vs 0 h (\*\* $p < 0.001$ ). **b, In vitro translocation of peptides 13-16.** Translocation (%) across the transwell BBB model quantified as fluorescence in the basolateral chamber after 24 h. A peptide with trans-BBB property was used as positive control. Values are mean  $\pm$  SEM of  $n=3-6$ . \*  $p < 0.05$ , \*\*  $p < 0.01$ , \*\*\*  $p < 0.001$  vs positive control (One-way ANOVA followed by a Dunnett post hoc tests). **c, BBB integrity to peptides 13-16.** Measured as permeability of fluorescent FD4 dextran upon peptide exposure. Values are mean  $\pm$  SEM of  $n=3-6$ . Statistical significance analysis was evaluated with a one-way ANOVA followed by Tukey's multiple comparison test and no statistical significance difference was observed between samples. **d, In vitro cytotoxicity of 13-16 towards bEnd.3 cells.** Viability (%) upon peptide incubation (0.01 – 50  $\mu\text{M}$ ) determined by CellTiter-Blue<sup>®</sup> Assay. Values are mean  $\pm$  SEM of  $n=3-6$ .

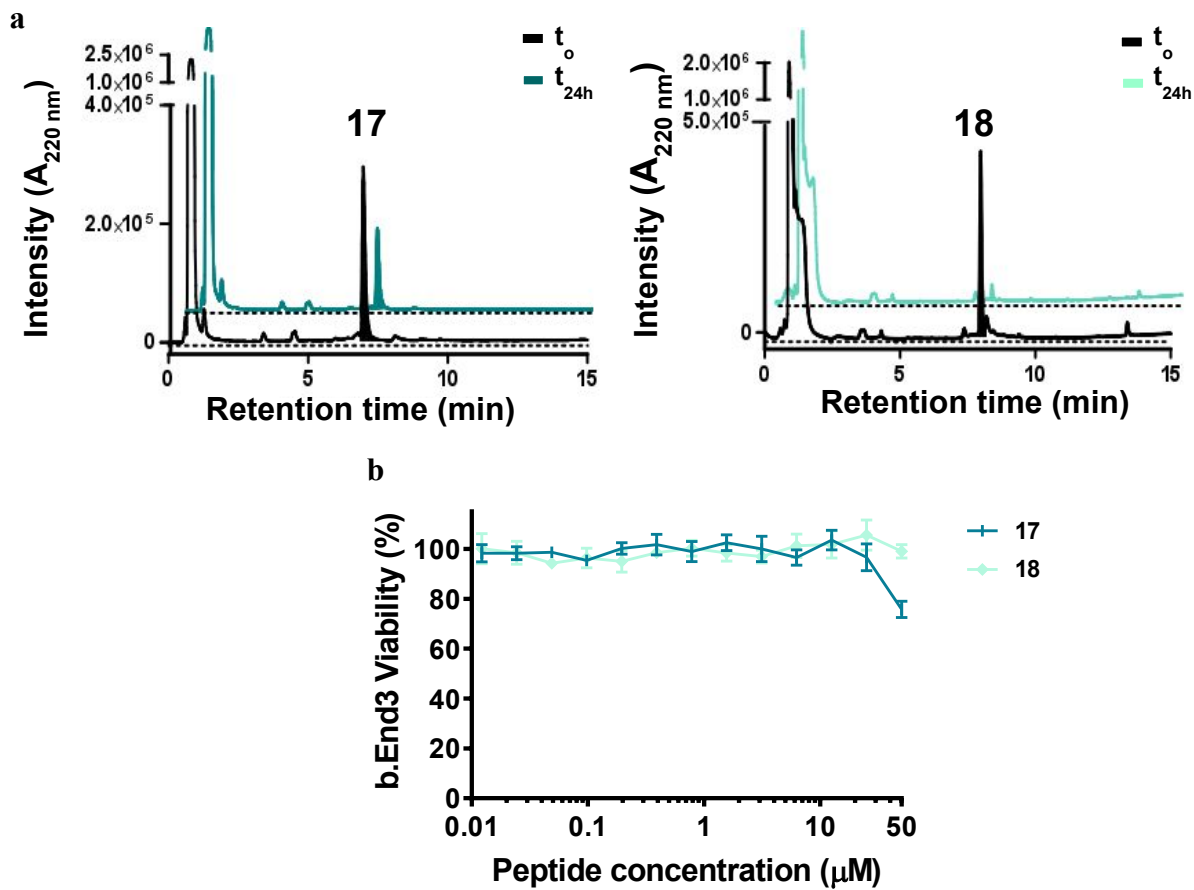

**Figure S3. a, HPLC analysis of serum-incubated peptides 17 and 18.** No significant new peaks referring to digested fragments were identified after 24 h. Peptide peak area decrease at 24h could be presumably attributed to binding to serum proteins. **b, *In vitro* cytotoxicity of 17 and 18 towards bEnd.3 cells.** Viability (%) upon peptide incubation (0.01 – 50 µM) determined by CellTiter-Blue® Assay. Values are mean ± SEM of n= 3–6.

### **3. Analytical data**

**HPLC-MS analysis.** Left: Overlaid HPLC traces of crude (grey) and purified peptide products (blue). Right: ESI-MS spectra of pure peptides.

**TM5-Tat: ETYLMFWIGVTSVLLLFIVYAYMYILWGRKKRRQRRR**

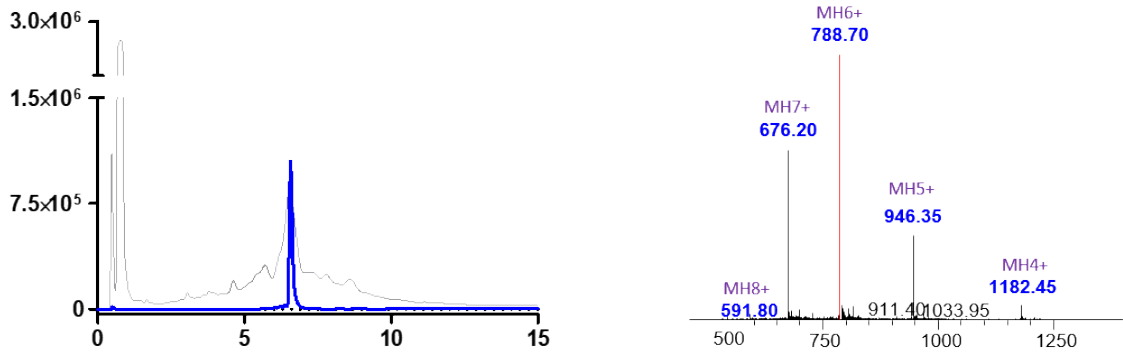

**Tat-TM6: GRKKRRQRRRKTLVLILVVLICWGPLLAIMVYDVF**

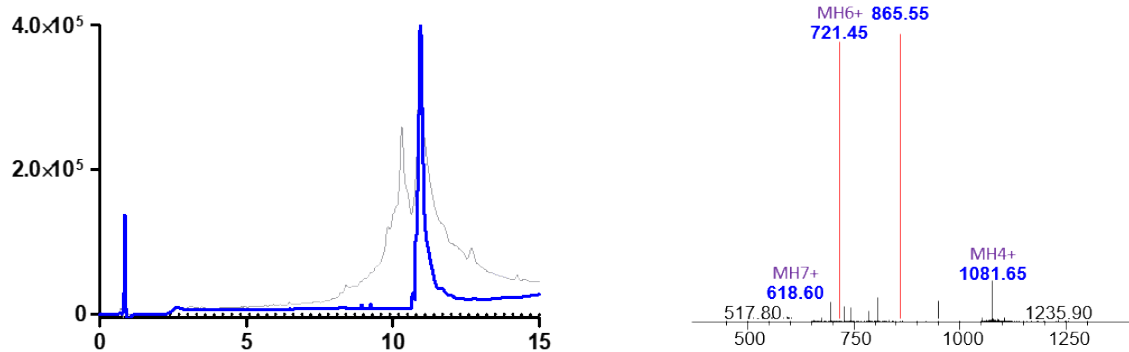

**TM7-Tat: LIKTVFAFCSMLCLLNSTVNPIYALRGRKKRRQRRR**

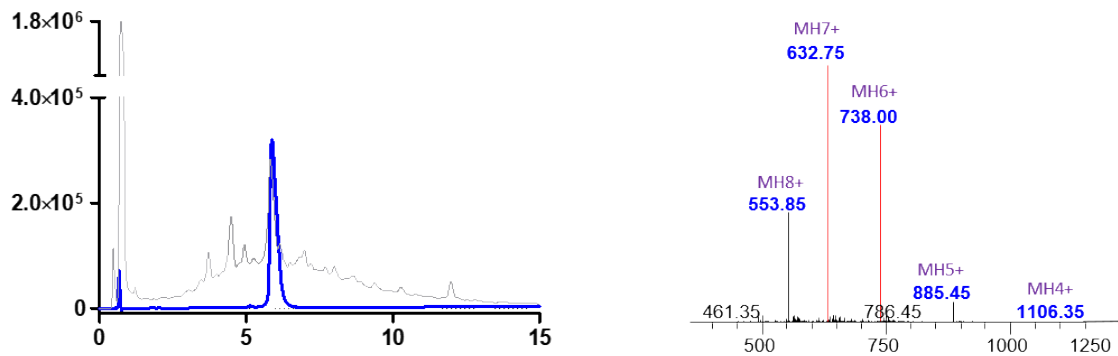

**1: VYAYMYILWGRKKRRQRRR**

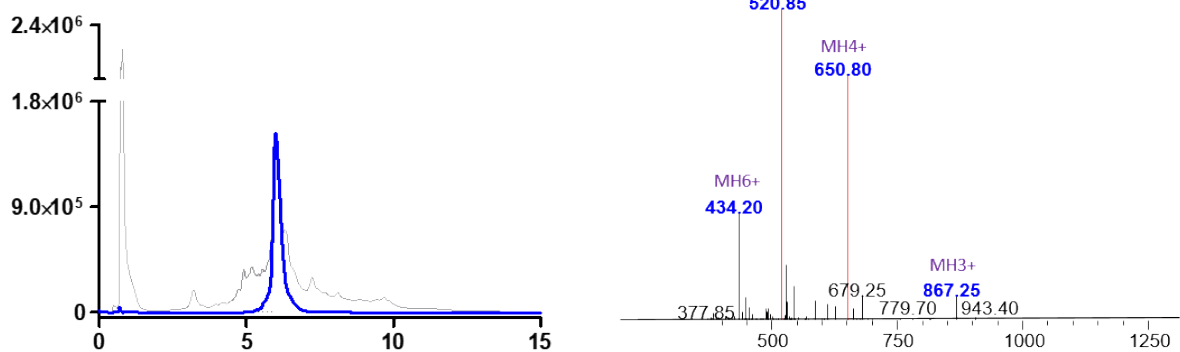

**2: VYAYMYILW**

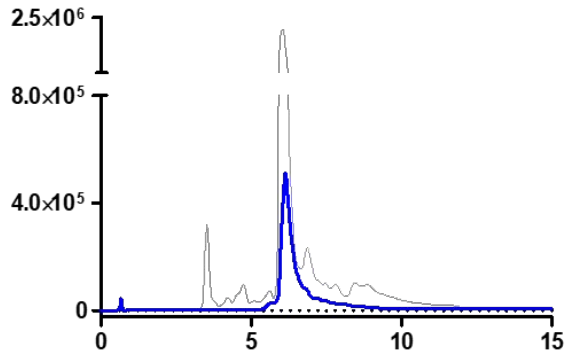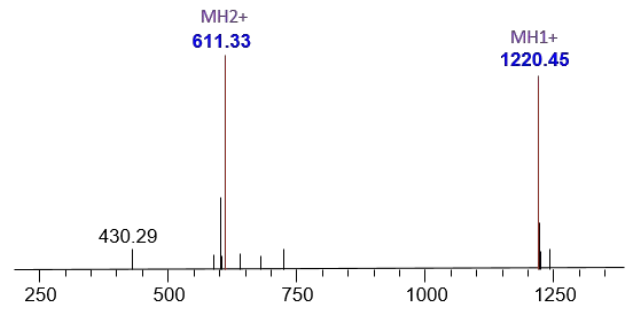

**3: GRKKRRQRRRKTLLVILVV**

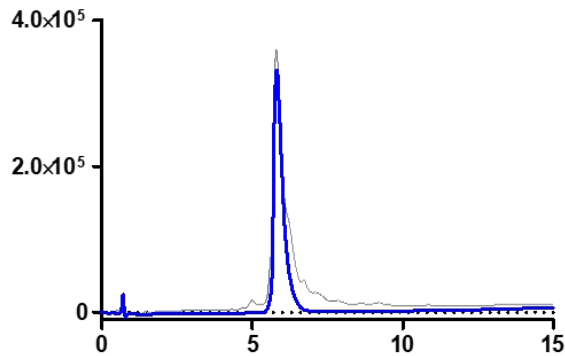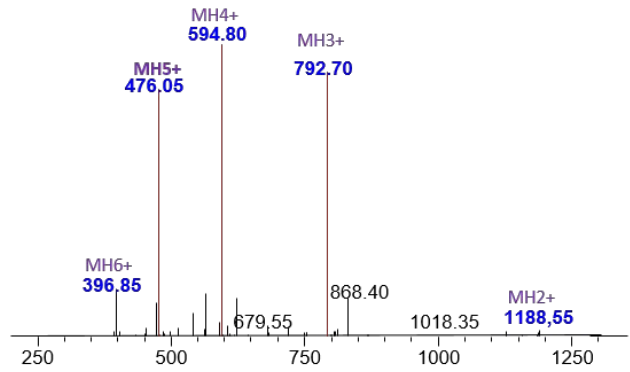

**4: KTLVLILVV**

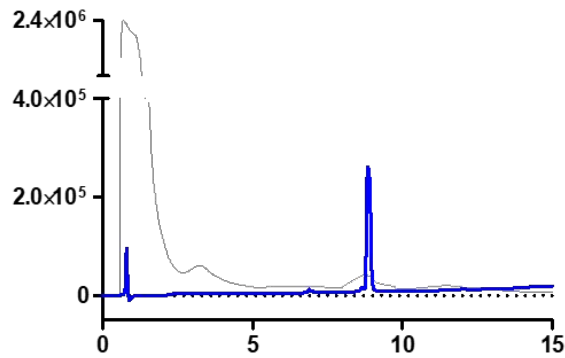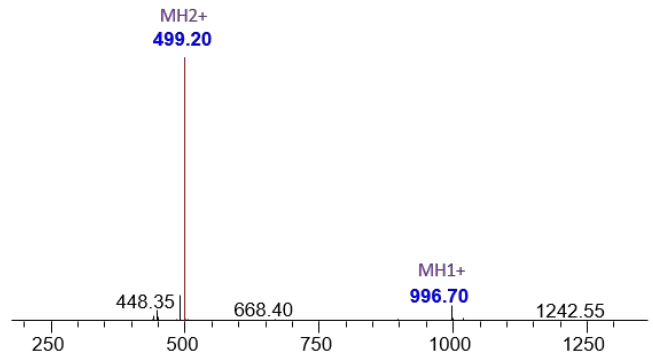

**5: VYAYMYILWAGILKRW**

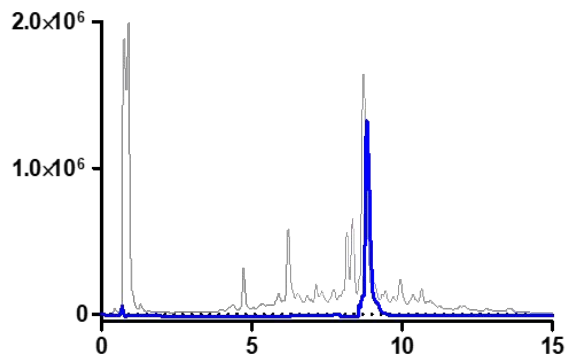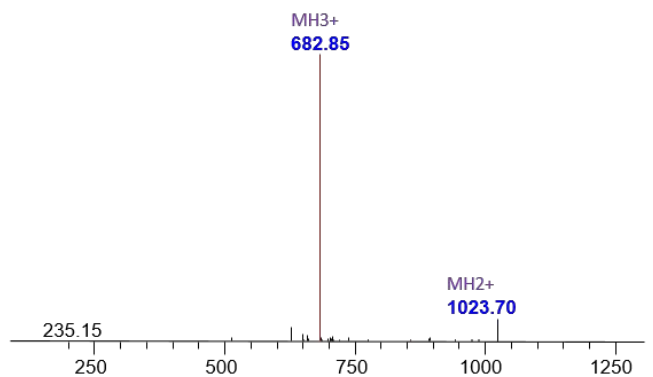

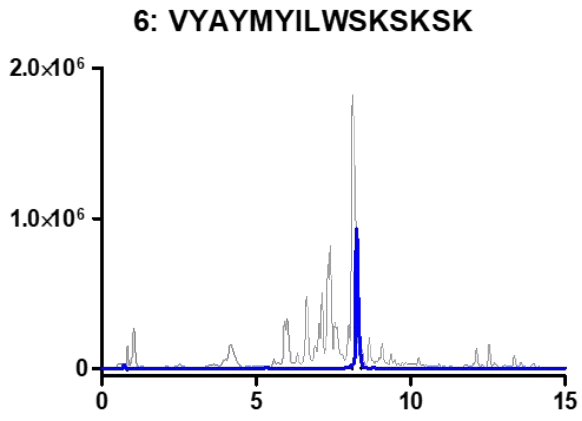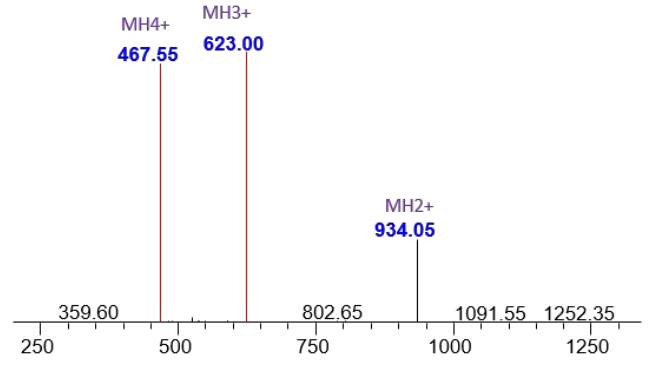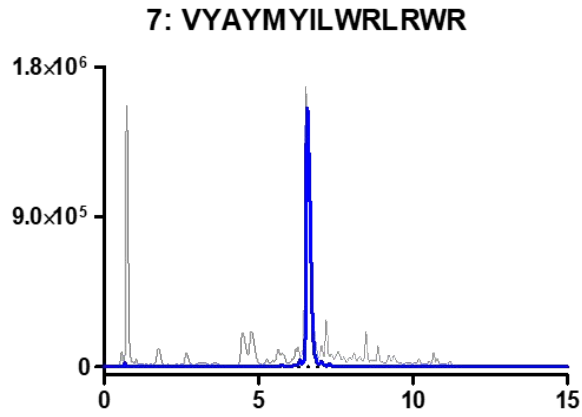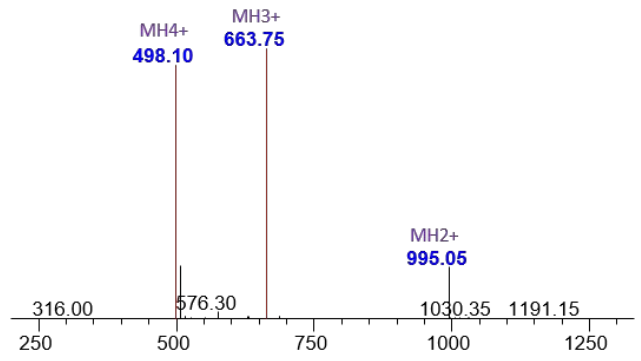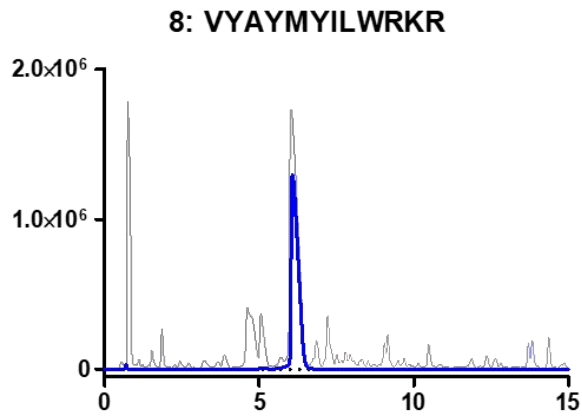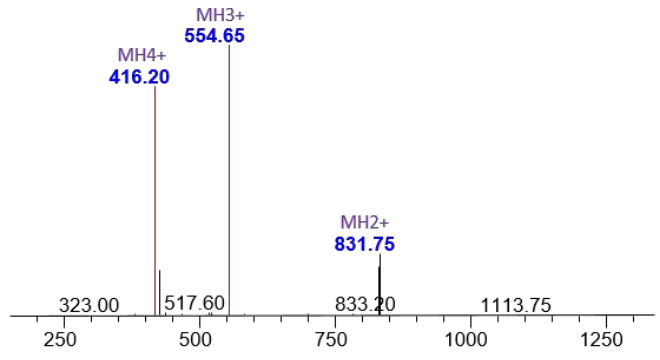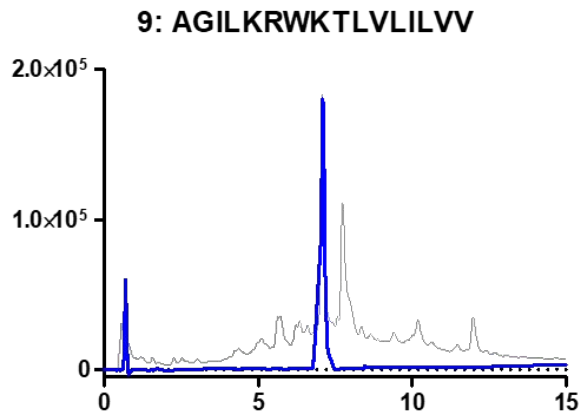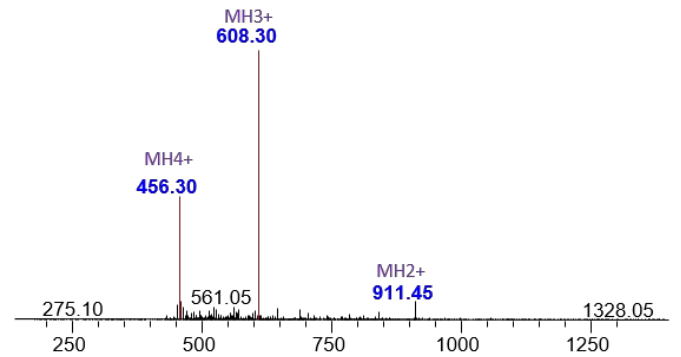



10: SKSKSKKTLVLILVV

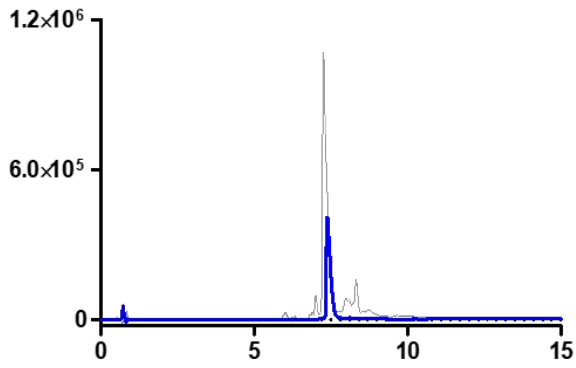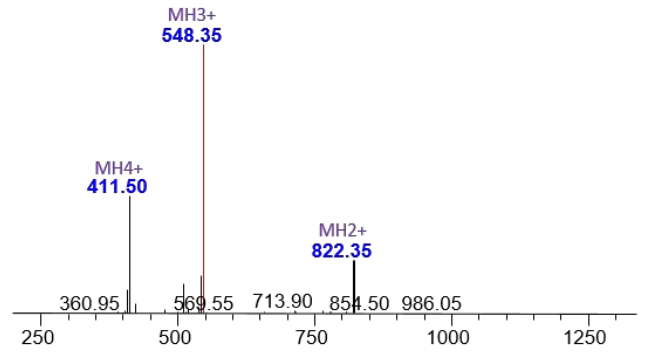

11: RLRWRKTLVLILVV

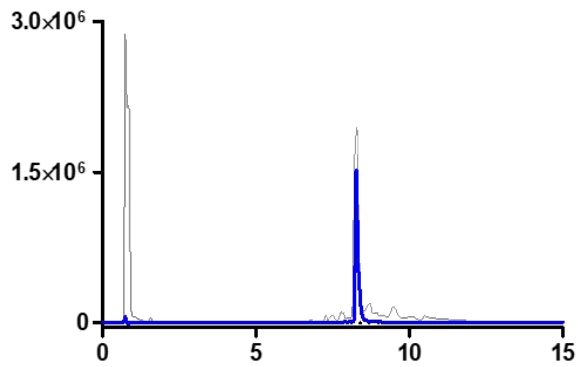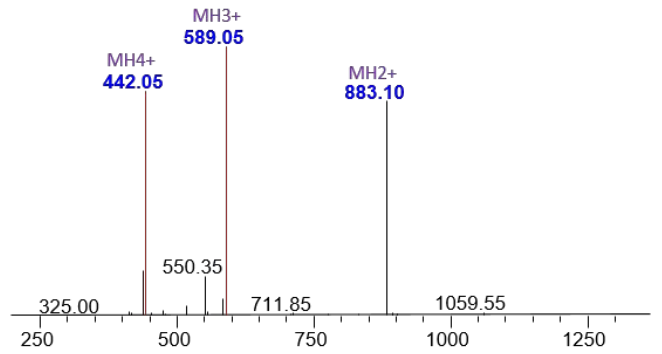

12: RKRKTLVLILVV

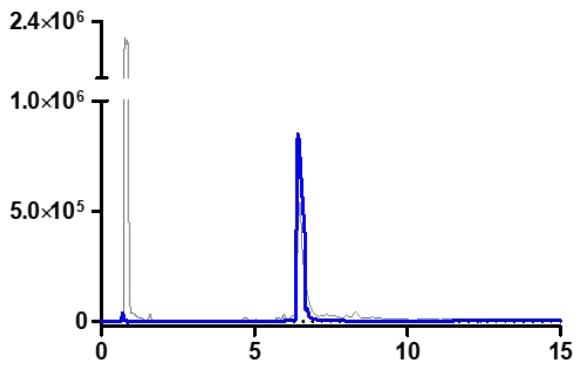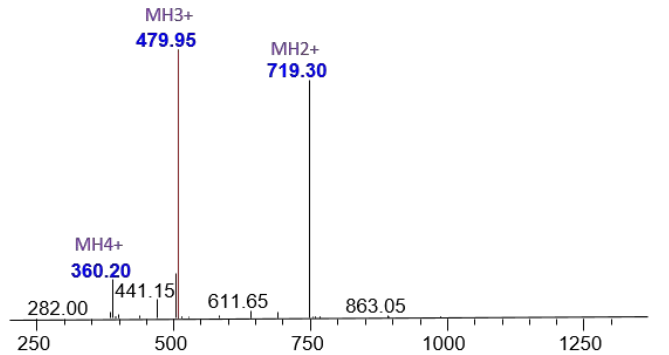

13: VYAYMYILWaGilk<sub>r</sub>w

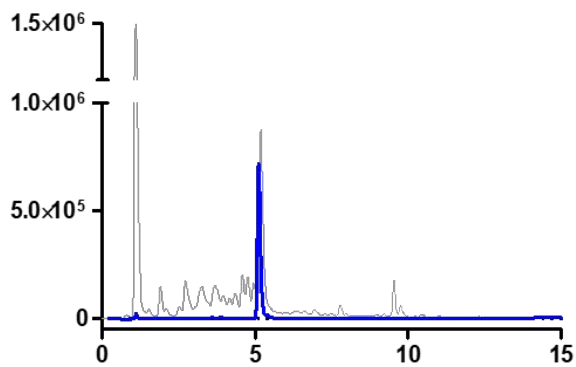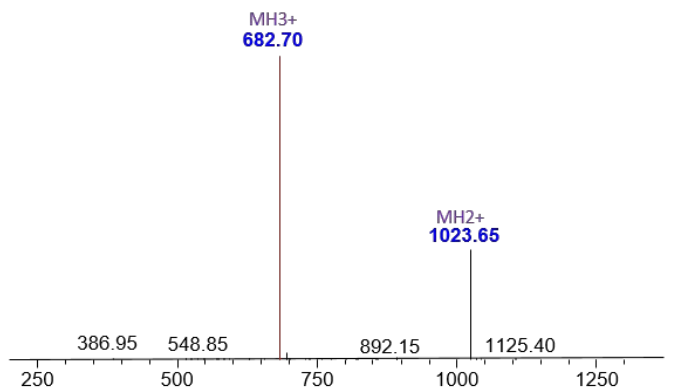

14: VYAYMYILWsksksk

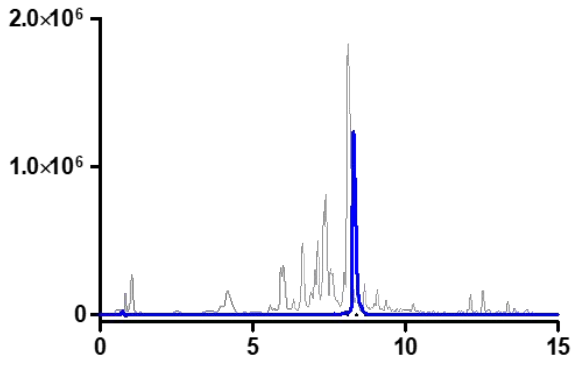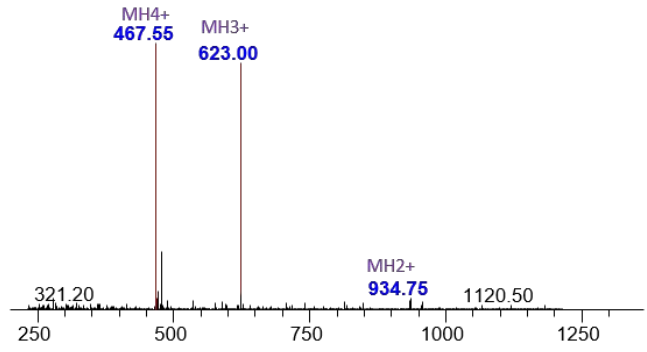

15: aGilkrrwKTLVLILVV

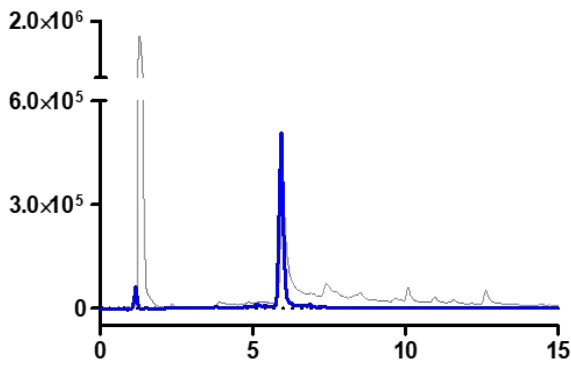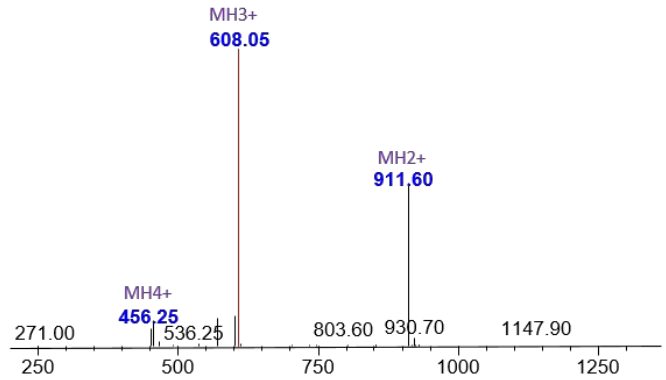

16: skskskKTLVLILVV

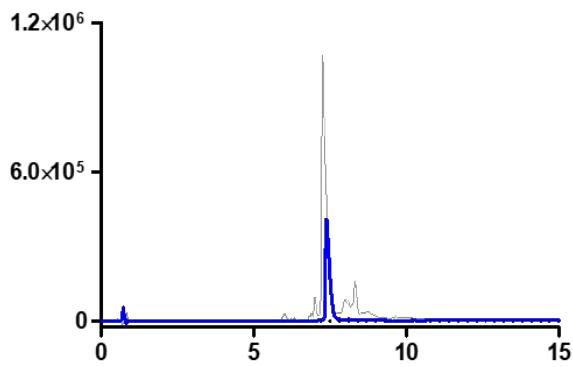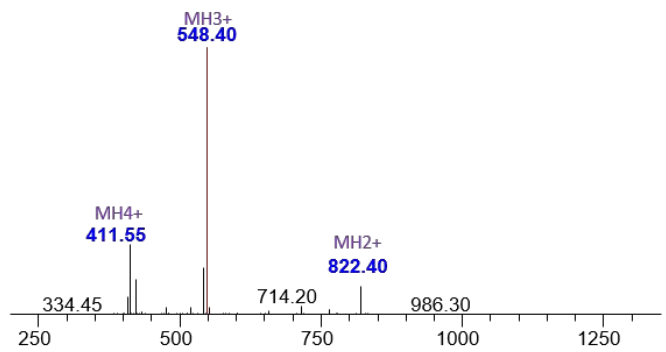

17: wliymyayvaGilkrrw

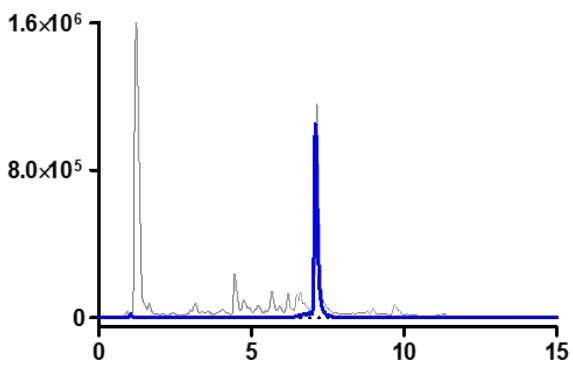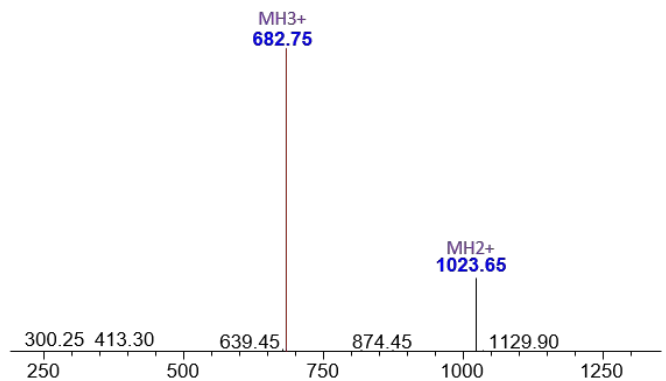

18: aGIlkrwvvlilvIk

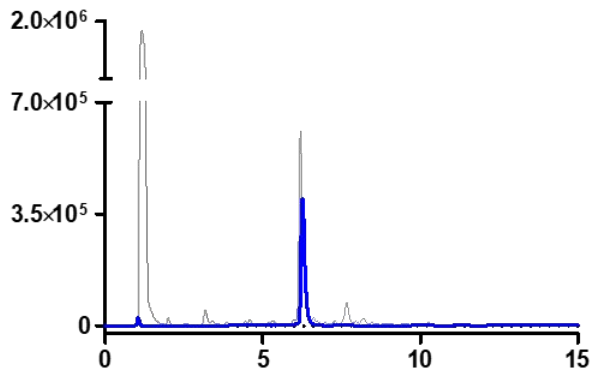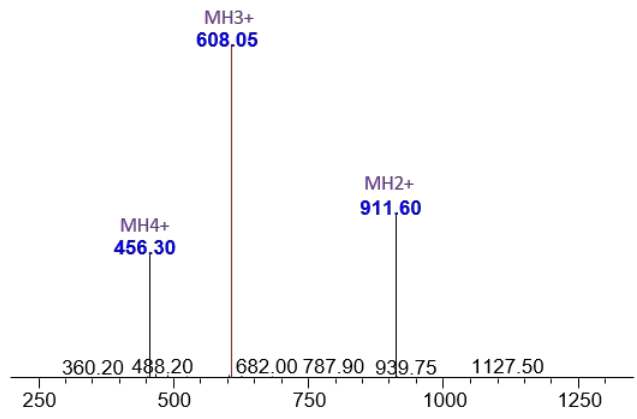

## 4. Molecular Formula Strings





|   |                                                                                                                                                                                                                                                                                                                                                                  |                                                                     |
|---|------------------------------------------------------------------------------------------------------------------------------------------------------------------------------------------------------------------------------------------------------------------------------------------------------------------------------------------------------------------|---------------------------------------------------------------------|
| 5 | N[C@@H](C(C)C)C(N[C@@H](CC1=CC=C(O)C=C1)C(N[C@@H](C)C(N[C@@H](CC2=CC=C(O)C=C2)C(N[C@@H](CCSC)C(N[C@@H](CC3=CC=C(O)C=C3)C(N[C@@H](C(CC)C)C(N[C@@H](CC(C)C)C(N[C@@H](CC4=CNC5=C4C=CC=C5)C(N[C@@H](C)C(NC([H])C(N[C@@H](C(CC)C)C(N[C@@H](CC(C)C)C(N[C@@H](CCCCN)C(N[C@@H](CCCN)C(N[C@@H](CC6=CNC7=C6C=CC=C7)C(N)=O)=O)=O)=O)=O)=O)=O)=O)=O)=O)=O)=O)=O)=O)=O)=O)=O) | C <sub>103</sub> H <sub>149</sub> N <sub>23</sub> O <sub>19</sub> S |
| 6 | N[C@@H](C(C)C)C(N[C@@H](CC1=CC=C(O)C=C1)C(N[C@@H](C)C(N[C@@H](CC2=CC=C(O)C=C2)C(N[C@@H](CCSC)C(N[C@@H](CC3=CC=C(O)C=C3)C(N[C@@H](C(CC)C)C(N[C@@H](CC(C)C)C(N[C@@H](CC4=CNC5=C4C=CC=C5)C(N[C@@H](CO)C(N[C@@H](CCCCN)C(N[C@@H](CO)C(N[C@@H](CCCCN)C(N)=O)=O)=O)=O)=O)=O)=O)=O)=O)=O)=O)=O)=O)=O)=O)                                                                | C <sub>90</sub> H <sub>136</sub> N <sub>20</sub> O <sub>21</sub> S  |
| 7 | N[C@@H]([C@@H](C)C)C(N[C@@H](CC1=CC=C(O)C=C1)C(N[C@@H](C)C(N[C@@H](CC2=C=C(O)C=C2)C(N[C@@H](CCSC)C(N[C@@H](CC3=CC=C(O)C=C3)C(N[C@@H](C(CC)C)C(N[C@@H](CC(C)C)C(N[C@@H](CC4=CNC5=C4C=CC=C5)C(N[C@@H](CCCNC(N)=N)C(N[C@@H](CC(C)C)C(N[C@@H](CCCNC(N)=N)C(N[C@@H](CC6=CNC7=C6C=CC=C7)C(N[C@@H](CCCNC(N)=N)C(N)=O)=O)=O)=O)=O)=O)=O)=O)=O)=O)=O)=O)=O)=O)=O)         | C <sub>98</sub> H <sub>142</sub> N <sub>26</sub> O <sub>17</sub> S  |
| 8 | N[C@@H](C(C)C)C(N[C@@H](CC1=CC=C(O)C=C1)C(N[C@@H](C)C(N[C@@H](CC2=CC=C(O)C=C2)C(N[C@@H](CCSC)C(N[C@@H](CC3=CC=C(O)C=C3)C(N[C@@H](C(CC)C)C(N[C@@H](CC(C)C)C(N[C@@H](CC4=CNC5=C4C=CC=C5)C(N[C@@H](CCCNC(N)=N)C(N[C@@H](CCCCN)C(N[C@@H](CCCNC(N)=N)C(N)=O)=O)=O)=O)=O)=O)=O)=O)=O)=O)=O)=O)=O)=O)                                                                   | C <sub>81</sub> H <sub>121</sub> N <sub>21</sub> O <sub>15</sub> S  |
| 9 | N[C@@H](C)C(NC([H])C(N[C@@H](C(CC)C)C(N[C@@H](CC(C)C)C(N[C@@H](CCCCN)C(N[C@@H](CCCNC(N)=N)C(N[C@@H](CC1=CNC2=C1C=CC=C2)C(N[C@@H](CCCCN)C(N[C@@H](C(C)O)C(N[C@@H](CC(C)C)C(N[C@@H](C(C)C)C(N[C@@H](CC(C)C)C(N[C@@H](C(CC)C)C(N[C@@H](CC(C)C)C(N[C@@H](CC(C)C)C(N[C@@H]([C@@H](C)C)C(N)=O)=O)=O)=O)=O)=O)=O)=O)=O)=O)=O)=O)=O)=O)=O)=O)=O)                         | C <sub>89</sub> H <sub>157</sub> N <sub>23</sub> O <sub>17</sub>    |

|    |                                                                                                                                                                                                                                                                                                                                                                         |                                                                     |
|----|-------------------------------------------------------------------------------------------------------------------------------------------------------------------------------------------------------------------------------------------------------------------------------------------------------------------------------------------------------------------------|---------------------------------------------------------------------|
| 10 | <chem>N[C@@H](CO)C(N[C@@H](CCCCN)C(N[C@@H](CO)C(N[C@@H](CCCCN)C(N[C@@H](CO)C(N[C@@H](CCCCN)C(N[C@@H](CCCCN)C(N[C@@H](C(C)O)C(N[C@@H](CC(C)C)C(N[C@@H]([C@@H](C)C)C(N[C@@H](CC(C)C)C(N[C@@H](C(C)C)C(N[C@@H](CC(C)C)C(N[C@@H]([C@@H](C)C)C(N[C@@H](C(C)C)C(N)=O)=O)=O)=O)=O)=O)=O)=O)=O)=O)=O)=O)=O)=O</chem>                                                            | C <sub>76</sub> H <sub>144</sub> N <sub>20</sub> O <sub>19</sub>    |
| 11 | <chem>N[C@@H](CCCNC(N)=N)C(N[C@@H](CC(C)C)C(N[C@@H](CCCNC(N)=N)C(N[C@@H](CC1=CN C2=C1C=CC=C2)C(N[C@@H](CCCNC(N)=N)C(N[C@@H](CCCCN)C(N[C@@H](C(C)O)C(N[C@@H](CC(C)C)C(N[C@@H](C(C)C)C(N[C@@H](CC(C)C)C(N[C@@H](C(C)C)C(N[C@@H](C(C)C)C(N[C@@H]([C@@H](C)C)C(N)=O)=O)=O)=O)=O)=O)=O)=O)=O)=O)=O)=O</chem>                                                                 | C <sub>84</sub> H <sub>150</sub> N <sub>26</sub> O <sub>15</sub>    |
| 12 | <chem>N[C@@H](CCCNC(N)=N)C(N[C@@H](CCCCN)C(N[C@@H](CCCNC(N)=N)C(N[C@@H](CCCCN)C(N[C@@H](C(C)O)C(N[C@@H](CC(C)C)C(N[C@@H]([C@@H](C)C)C(N[C@@H](CC(C)C)C(N[C@@H](C(C)C)C(N[C@@H](CC(C)C)C(N[C@@H]([C@@H](C)C)C(N[C@@H](C(C)C)C(N)=O)=O)=O)=O)=O)=O)=O)=O)=O)=O</chem>                                                                                                     | C <sub>67</sub> H <sub>129</sub> N <sub>21</sub> O <sub>13</sub>    |
| 13 | <chem>N[C@@H](C(C)C)C(N[C@@H](CC1=CC=C(O)C=C1)C(N[C@@H](C)C(N[C@@H](CC2=CC=C(O)C=C2)C(N[C@@H](CCSC)C(N[C@@H](CC3=CC=C(O)C=C3)C(N[C@@H](C(C)C)C(N[C@@H](CC(C)C)C(N[C@@H](CC4=CNC5=C4C=CC=C5)C(N[C@@H](C)C(NC([H])C(N[C@@H](C(C)C)C(N[C@@H](CC(C)C)C(N[C@@H](CCCCN)C(N[C@@H](CCCNC(N)=N)C(N[C@@H](CC6=CNC7=C6C=CC=C7)C(N)=O)=O)=O)=O)=O)=O)=O)=O)=O)=O)=O)=O)=O)=O</chem> | C <sub>103</sub> H <sub>149</sub> N <sub>23</sub> O <sub>19</sub> S |
| 14 | <chem>N[C@@H](C(C)C)C(N[C@@H](CC1=CC=C(O)C=C1)C(N[C@@H](C)C(N[C@@H](CC2=CC=C(O)C=C2)C(N[C@@H](CCSC)C(N[C@@H](CC3=CC=C(O)C=C3)C(N[C@@H](C(C)C)C(N[C@@H](CC(C)C)C(N[C@@H](CC4=CNC5=C4C=CC=C5)C(N[C@@H](CO)C(N[C@@H](CCCCN)C(N[C@@H](CO)C(N[C@@H](CCCCN)C(N)=O)=O)=O)=O)=O)=O)=O)=O)=O)=O)=O)=O</chem>                                                                     | C <sub>90</sub> H <sub>136</sub> N <sub>20</sub> O <sub>21</sub> S  |



|    |                                                                                                                                                                                                                                                                                                                                                              |                                                                     |
|----|--------------------------------------------------------------------------------------------------------------------------------------------------------------------------------------------------------------------------------------------------------------------------------------------------------------------------------------------------------------|---------------------------------------------------------------------|
| 15 | <chem>N[C@H](C)C(NC([H])C(N[C@H](C(CC)C)C(N[C@H](CC(C)C)C(N[C@H](CCCCN)C(N[C@H](CCCNC(N)=N)C(N[C@H](CC1=CNC2=C1C=CC=C2)C(N[C@@H](CCCCN)C(N[C@@H](C(C)O)C(N[C@@H](CC(C)C)C(N[C@@H](C(C)C)C(N[C@@H](CC(C)C)C(N[C@@H](C(CC)C)C(N[C@@H](CC(C)C)C(N[C@@H]([C@@H](C)C)C(N[C@@H]([C@@H](C)C)C(N)=O)=O)=O)=O)=O)=O)=O)=O)=O)=O)=O)=O</chem>                          | C <sub>89</sub> H <sub>157</sub> N <sub>23</sub> O <sub>17</sub>    |
| 16 | <chem>N[C@H](CO)C(N[C@H](CCCCN)C(N[C@H](CO)C(N[C@H](CCCCN)C(N[C@H](CO)C(N[C@H](CCCCN)C(N[C@@H](CCCCN)C(N[C@@H](C(C)O)C(N[C@@H](CC(C)C)C(N[C@@H](C(C)C)C(N[C@@H](CC(C)C)C(N[C@@H](C(CC)C)C(N[C@@H](CC(C)C)C(N[C@@H]([C@@H](C)C)C(N[C@@H]([C@@H](C)C)C(N)=O)=O)=O)=O)=O)=O)=O)=O)=O)=O)=O)=O)=O</chem>                                                         | C <sub>76</sub> H <sub>144</sub> N <sub>20</sub> O <sub>19</sub>    |
| 17 | <chem>N[C@H](CC1=CNC2=C1C=CC=C2)C(N[C@H](CC(C)C)C(N[C@H](C(CC)C)C(N[C@H](CC3=CC=C(O)C=C3)C(N[C@H](CCSC)C(N[C@H](CC4=CC=C(O)C=C4)C(N[C@H](C)C(N[C@H](CC5=CC=C(O)C=C5)C(N[C@H]([C@@H](C)C)C(N[C@H](C)C(NC([H])C(N[C@H](C(CC)C)C(N[C@H](CC(C)C)C(N[C@H](CCCCN)C(N[C@H](CCCNC(N)=N)C(N[C@H](CC6=CNC7=C6C=CC=C7)C(N)=O)=O)=O)=O)=O)=O)=O)=O)=O)=O)=O)=O)=O</chem> | C <sub>103</sub> H <sub>149</sub> N <sub>23</sub> O <sub>19</sub> S |
| 18 | <chem>N[C@H](C)C(NC([H])C(N[C@H](C(CC)C)C(N[C@H](CC(C)C)C(N[C@H](CCCCN)C(N[C@H](CCCNC(N)=N)C(N[C@H](CC1=CNC2=C1C=CC=C2)C(N[C@H](C(C)C)C(N[C@H](C(C)C)C(N[C@H](C(C)C)C(N[C@H](C(CC)C)C(N[C@H](CC(C)C)C(N[C@H](C(C)C)C(N[C@H](CC(C)C)C(N[C@H](C(C)O)C(N[C@H](CCCCN)C(N)=O)=O)=O)=O)=O)=O)=O)=O)=O)=O)=O)=O)=O)=O)=O</chem>                                     | C <sub>89</sub> H <sub>157</sub> N <sub>23</sub> O <sub>17</sub>    |
